# Supplementary material for: Knockdown of a novel lincRNA AATBC suppresses proliferation and induces apoptosis in bladder cancer
Source: PubMed Central journal article supplement (PMC4359217; doi:10.18632/oncotarget.2833), 2014-11-25

# Knockdown of a novel LincRNA AATBC suppresses proliferation and induces apoptosis in bladder cancer

## Supplementary Material

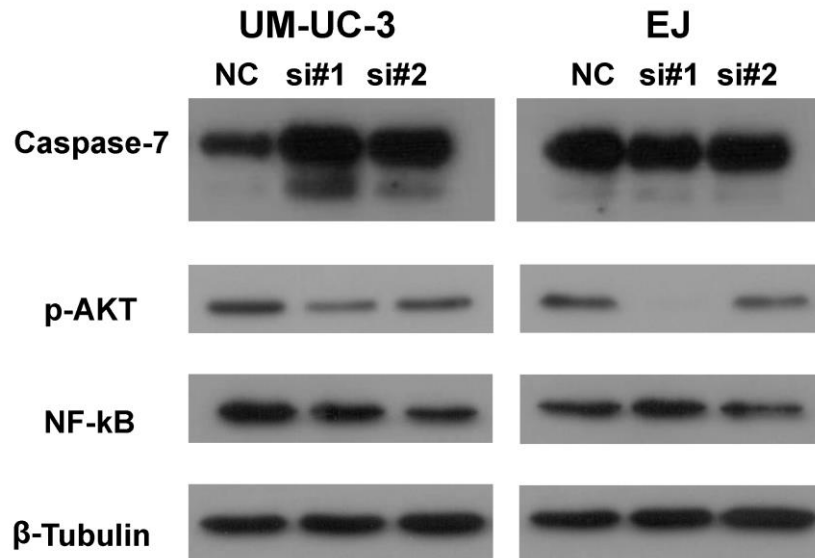

Supplementary Figure1

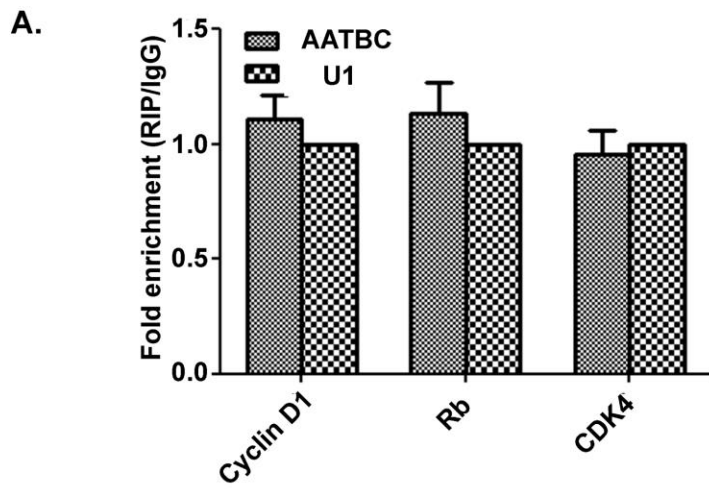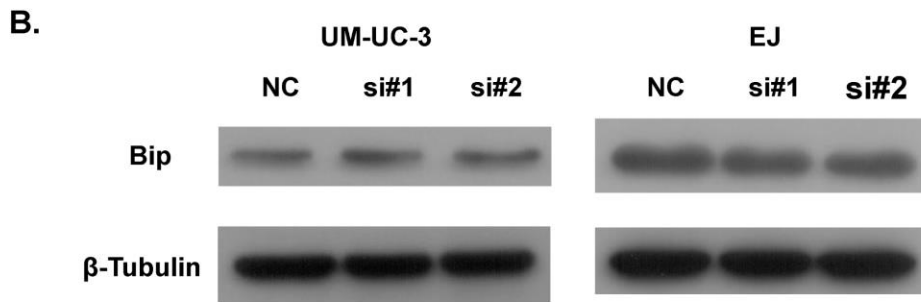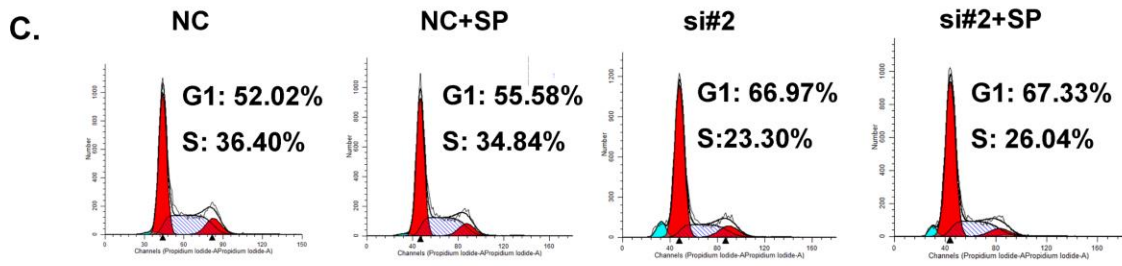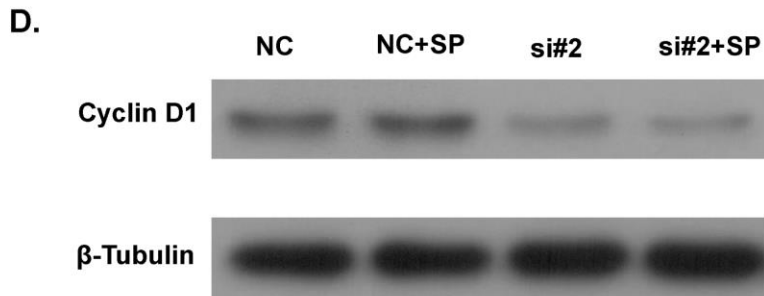

Supplement: oncotarget-06-1064-s001.pdf [file oncotarget-06-1064-s001.pdf]
